# Supplementary material for: The influence of electrode structure on the performance of an SnS anode in Li-ion batteries: effect of the electrode particle, conductive support shape and additive
Source: Royal Society of Chemistry journal article supplement (doi:10.1039/c5ra00226e), 2015-01-01
Supplement: c5ra00226e1.pdf [file c5ra00226e1.pdf]

Supporting Information for:-

## Electrode structure on performance of SnS anode in Li-ion batteries: Effect of electrode particle, conductive support shape and additive

*Alok M. Tripathi, and Sagar Mitra\**

Electrochemical Energy Laboratory  
Department of Energy Science and Engineering  
Indian Institute of Technology Bombay, Powai, Mumbai (INDIA)-400076  
E-mail: [sagar.mitra@iitb.ac.in](mailto:sagar.mitra@iitb.ac.in)

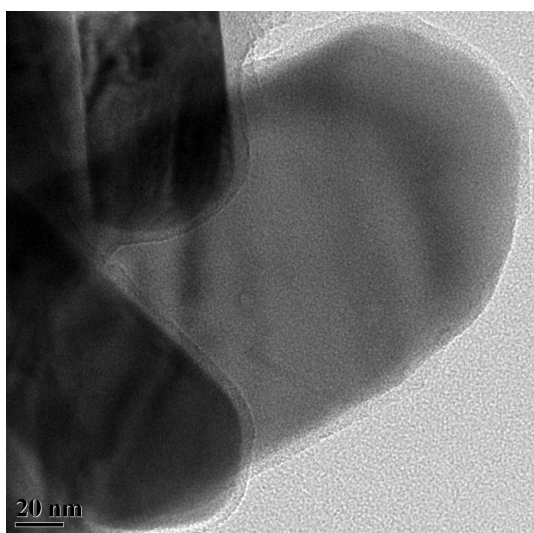

**Fig. S1.** TEM image of carbon coated SnS NRs prepared at carbonization temperature of 400 °C

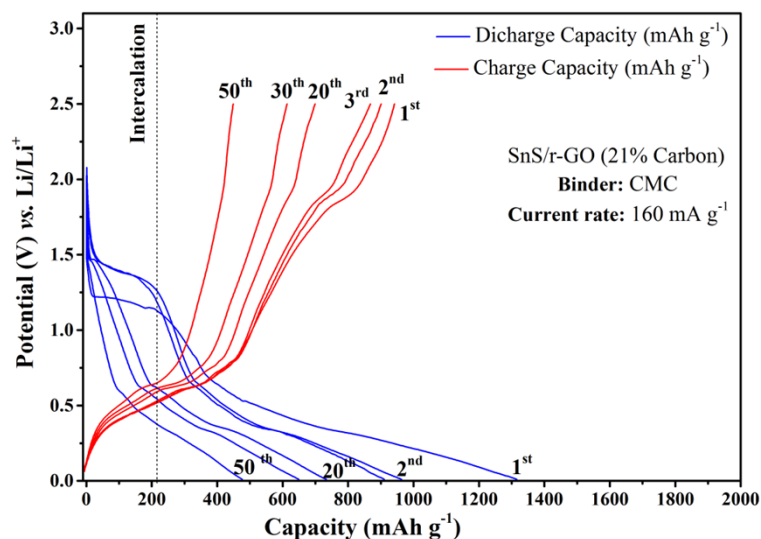

**Fig. S2.** Potential vs. capacity plot of SnS NRs/r-GO (21% carbon) electrode with CMC binder in the potential window of 0.01 V-2.5 V at current rate of 160 mA g<sup>-1</sup> against Li/Li<sup>+</sup>.

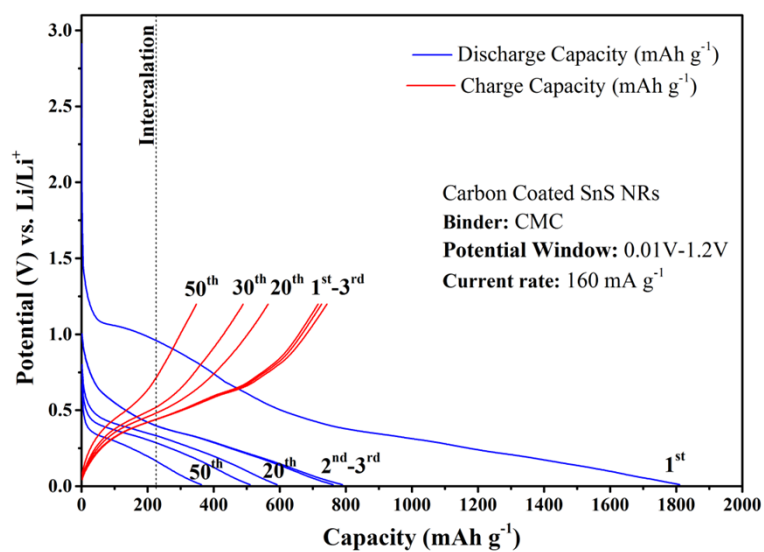

**Fig. S3.** Potential vs. capacity plot of carbon coated SnS NRs (18.5 % carbon) electrode with CMC binder in the potential window of 0.01 V-1.2 V at current rate of 160 mA g<sup>-1</sup> against Li/Li<sup>+</sup>.

**(a)** Carbon Coated SnS (CMC)

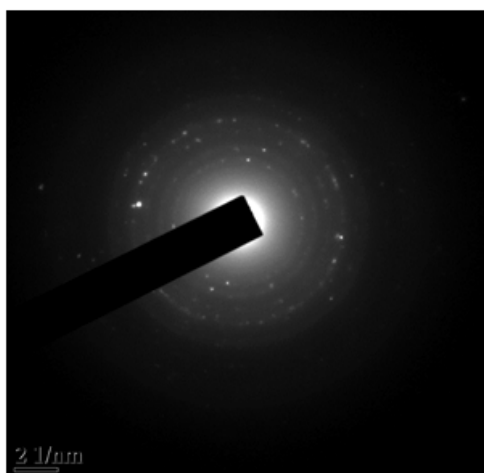

**(b)** SnS/r-GO (31% r-GO) PVDF

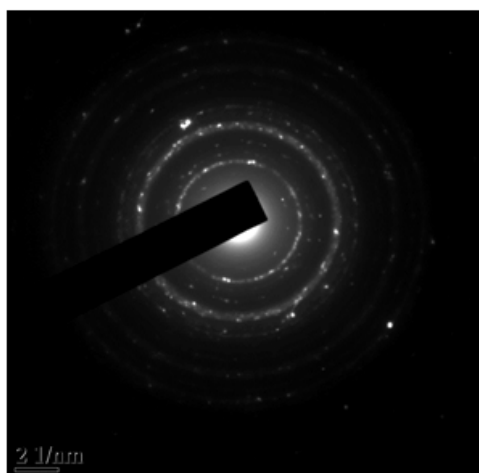

**(c)** SnS/r-GO (21% r-GO) CMC

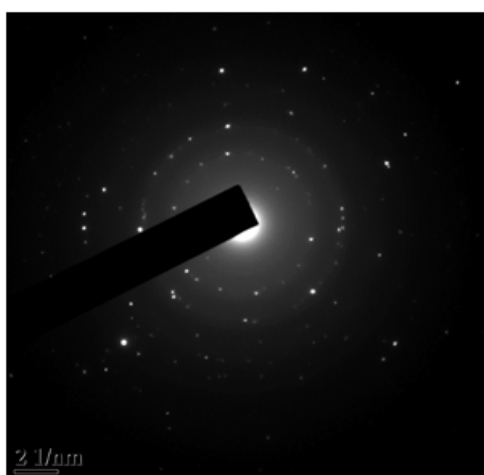

**(d)** SnS/r-GO (31% r-GO) CMC

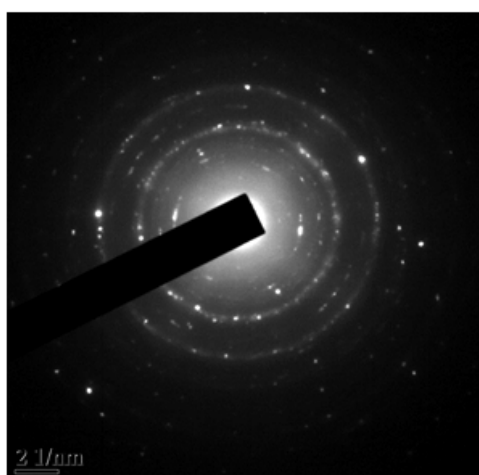

**Fig. S4.** SAED images of *ex-situ* samples of electrodes after 50<sup>th</sup> discharge cycle in a potential window of 0.01V-2.5V at current rate of 160 mA g<sup>-1</sup> against Li/Li<sup>+</sup> (a) Carbon coated SnS NRs with CMC binder in potential window of 0.01V-1.2V, (b) SnS/r-GO (31%carbon) with PVDF binder, (c) SnS/r-GO (21% carbon) with CMC binder, and (d) SnS/r-GO (31% carbon) with CMC binder.
